# Supplementary material for: Microbiome Profiles in Periodontitis in Relation to Host and Disease Characteristics
Source: PubMed Central journal article supplement (PMC4436126; doi:10.1371/journal.pone.0127077), 2015-05-18
Supplement: pone.0127077.s001.pdf [file pone.0127077.s001.pdf]

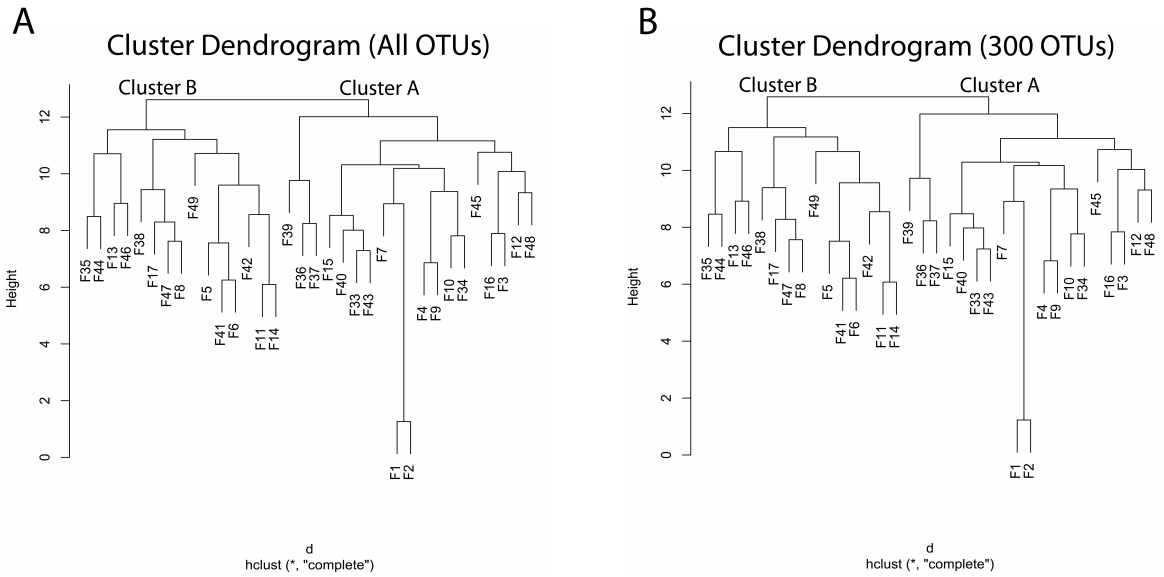

**Figure S1.** Dendrograms depicting unsupervised hierarchical clustering (complete linkage) of subjects according to OTU relative abundance profiles. Clustering based on all OTUs is shown in A and clustering based on the 300 most abundant OTUs is shown in B. Identical results indicate the top 300 OTUs drive clustering of samples.
