# Supplementary material for: Microbiome Profiles in Periodontitis in Relation to Host and Disease Characteristics
Source: PubMed Central journal article supplement (PMC4436126; doi:10.1371/journal.pone.0127077), 2015-05-18
Supplement: pone.0127077.s002.pdf [file pone.0127077.s002.pdf]

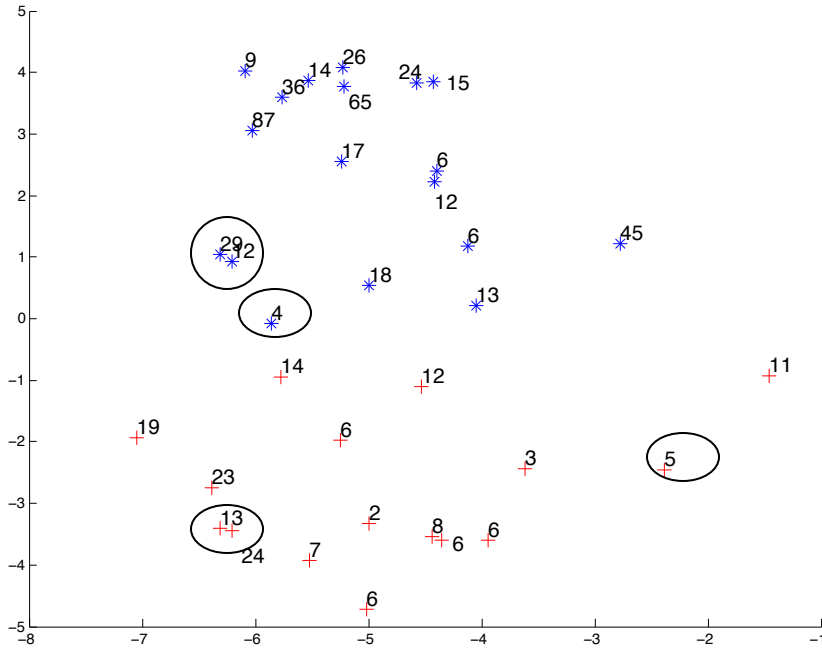

**Figure S2.** Two-dimensional scatter plot showing clustering of samples according to k-means. Two dimensional scatter plot was created after Singular Value Decomposition (SVD) of the matrix containing the OTU relative abundance data. X-axis represents component 1 and y-axis represents component 2. Data points are colored according to placement of subjects in k-means clusters with cluster A in red and cluster B in blue. Data points encircled were those that fell into a different cluster when using the unsupervised hierarchical method. Numerical values besides each data point represent % sites with  $PD \geq 5$  mm.
