# Supplementary material for: Microbiome Profiles in Periodontitis in Relation to Host and Disease Characteristics
Source: PubMed Central journal article supplement (PMC4436126; doi:10.1371/journal.pone.0127077), 2015-05-18
Supplement: pone.0127077.s006.pdf [file pone.0127077.s006.pdf]

■ L ■ S

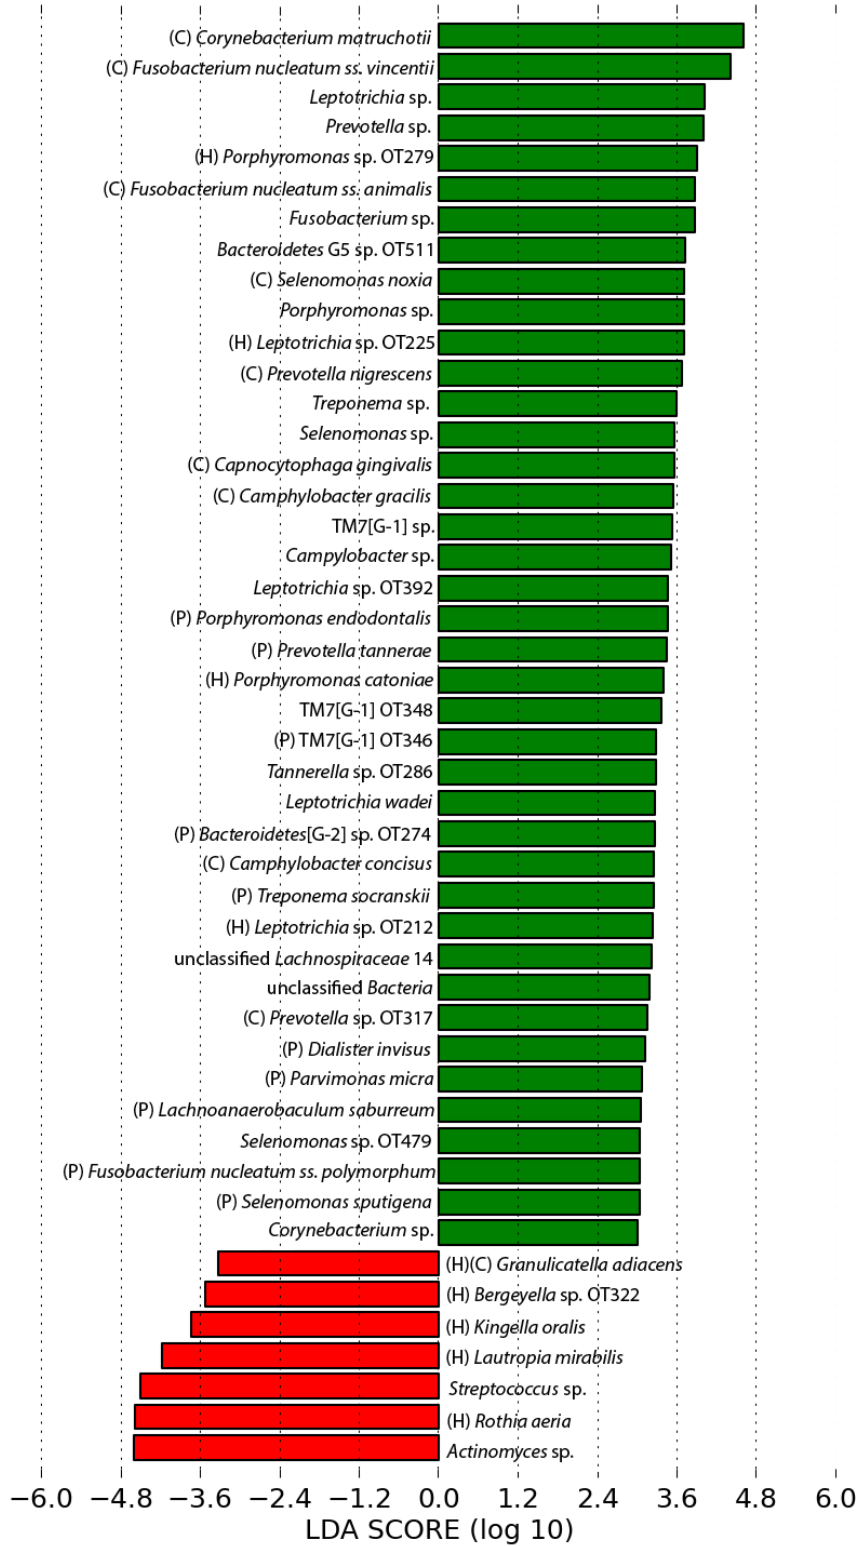

**S6 Figure. Phlotypes enriched in HMP clusters.** Graph shows phlotypes with a statistically significant difference in relative abundance between the large and small HMP clusters depicted in S5 Fig. Statistical significance was determined using LEfSe with alpha values set at 0.01 and the threshold for the logarithmic linear discriminant analysis (LDA) score for discriminative features set at 3.0. Phlotypes were labeled according to their association with health or periodontitis considering data from Abusleme et al. [6], Perez-Chaparro et al. [31] and a comparison of our periodontitis samples with HMP healthy subjects (S4 Fig). Taxa were classified as P (periodontitis), H (health) and C (core species), according to at least one study. If a disagreement existed between studies, taxa were labeled under more than one category.
