# Supplementary material for: Microbiome Profiles in Periodontitis in Relation to Host and Disease Characteristics
Source: PubMed Central journal article supplement (PMC4436126; doi:10.1371/journal.pone.0127077), 2015-05-18
Supplement: pone.0127077.s007.pdf [file pone.0127077.s007.pdf]

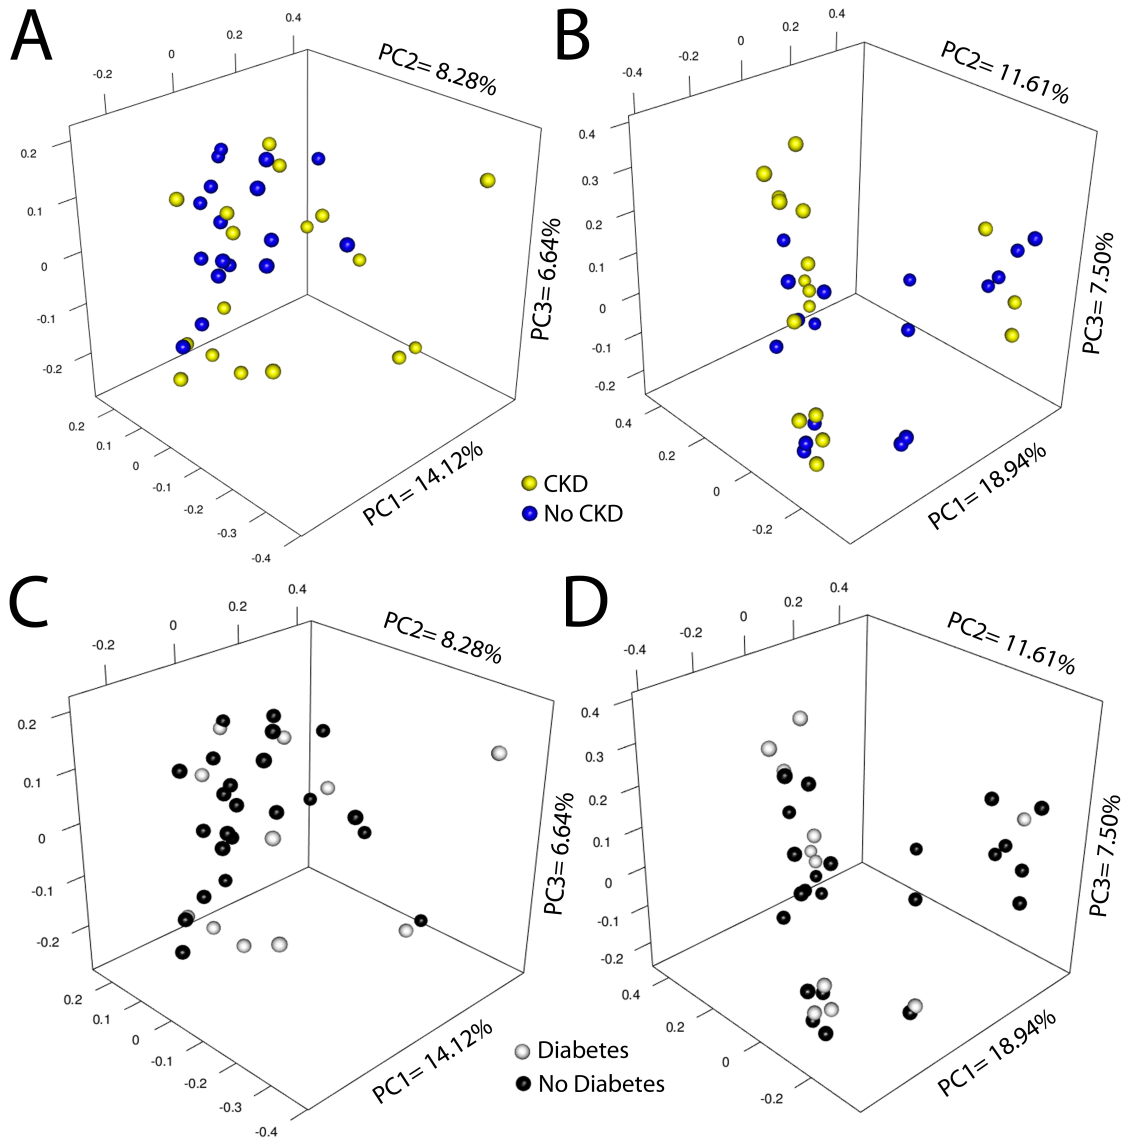

**Figure S7. CKD and diabetes do not drive clustering of periodontitis microbial communities.** Graphs represent PCoA plots of distances among samples. Graphs A and C are based on the Jaccard index and therefore indicate differences in community composition. Graphs B and D are based on the  $\theta$ YC index and therefore indicate differences in community structure. Amova comparisons were not statistically significant (A, Jaccard CKD vs No CKD:  $P=0.89$ ; B,  $\theta$ YC CKD vs No CKD:  $P=0.436$ ; C, Jaccard Diabetes vs No Diabetes:  $P=0.463$ ; D,  $\theta$ YC Diabetes vs No Diabetes:  $P=0.334$ ).
